# Supplementary material
Source: publisher site journal article supplement (https://www.dovepress.com/article/234935)
Supplement: Supplementary file 1 [file get_supplementary_file.php]

**A**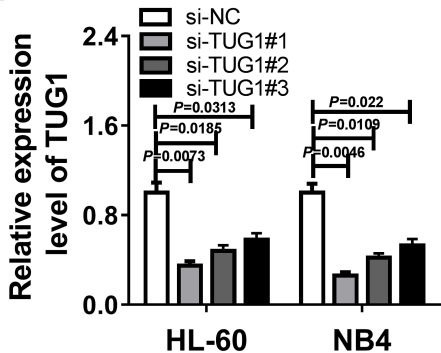**B**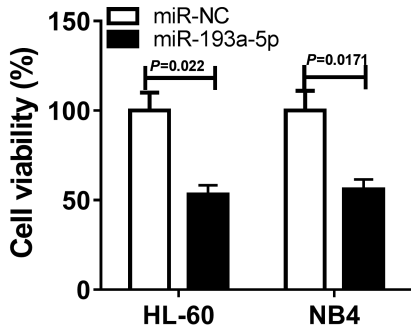

## Supplementary Figure legends

### **Supplementary Fig. 1 Detection of the knockdown efficiency of si-TUG1#1, si-TUG1#2 and si-TUG1#3 and the percentage of viability of HL-60 and NB4 cells.**

(A) The expression level of TUG1 in AML HL-60 and NB4 cells transfected with si-NC, si-TUG1#1, si-TUG1#2 or si-TUG1#3 was examined by qRT-PCR assay. (HL-60: si-TUG1#1 VS si-NC,  $P=0.0073$ ; si-TUG1#2 VS si-NC,  $P=0.0185$ ; si-TUG1#3 VS si-NC,  $P=0.0313$ ) (NB4: si-TUG1#1 VS si-NC,  $P=0.0046$ ; si-TUG1#2 VS si-NC,  $P=0.0109$ ; si-TUG1#3 VS si-NC,  $P=0.022$ ). (B) At 72 h post transfection, the percentage of viability of AML HL-60 and NB4 cells transfected with miR-NC and miR-193a-5p was analyzed by CCK-8 assay. (HL-60: miR-193a-5p VS miR-NC,  $P=0.022$ ) (NB4: miR-193a-5p VS miR-NC,  $P=0.0171$ ).
